# Supplementary material for: Early Age of Onset Is an Independent Predictor for a Worse Response to Neoadjuvant Therapies in Sporadic Rectal Cancer Patients
Source: MDPI journal article supplement (doi:10.3390/cancers15143750), 2023-07-24
Supplement: s1 [file s1]

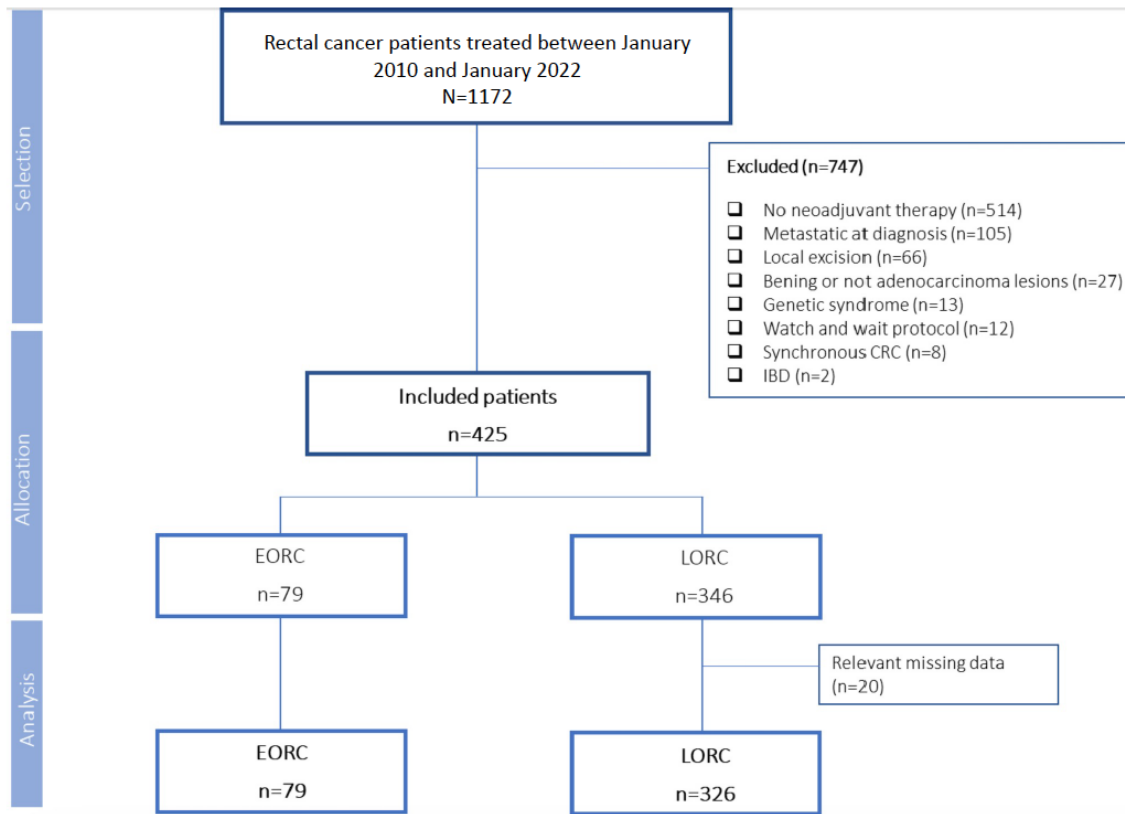

**Supplementary Figure S1: Study flow chart**

**Supplementary Table S1: Patients' comorbidities**

| Comorbidities              | LORC        | EORC     | <i>p</i> -value |
|----------------------------|-------------|----------|-----------------|
| Number of patients         | 228 (47.3%) | 17 (22%) | <0.0001         |
| Cardiovascular             | 108         | 2        |                 |
| Pulmonary                  | 8           | 2        |                 |
| Metabolic                  | 12          | 6        |                 |
| Autoimmune/Rheumatic       | 24          | 1        |                 |
| Cardiovascular & Metabolic | 66          | 0        |                 |
| Kidney                     | 5           | 0        |                 |
| Others                     | 5           | 6        |                 |
